# Supplementary material for: Proper chromosome alignment depends on BRCA2 phosphorylation by PLK1
Source: PubMed Central journal article supplement (PMC7156385; doi:10.1038/s41467-020-15689-9), 2020-04-14
Supplement: 41467_2020_15689_MOESM1_ESM.pdf [file 41467_2020_15689_MOESM1_ESM.pdf]

## **Supplementary information**

Ehlen *et al.*,

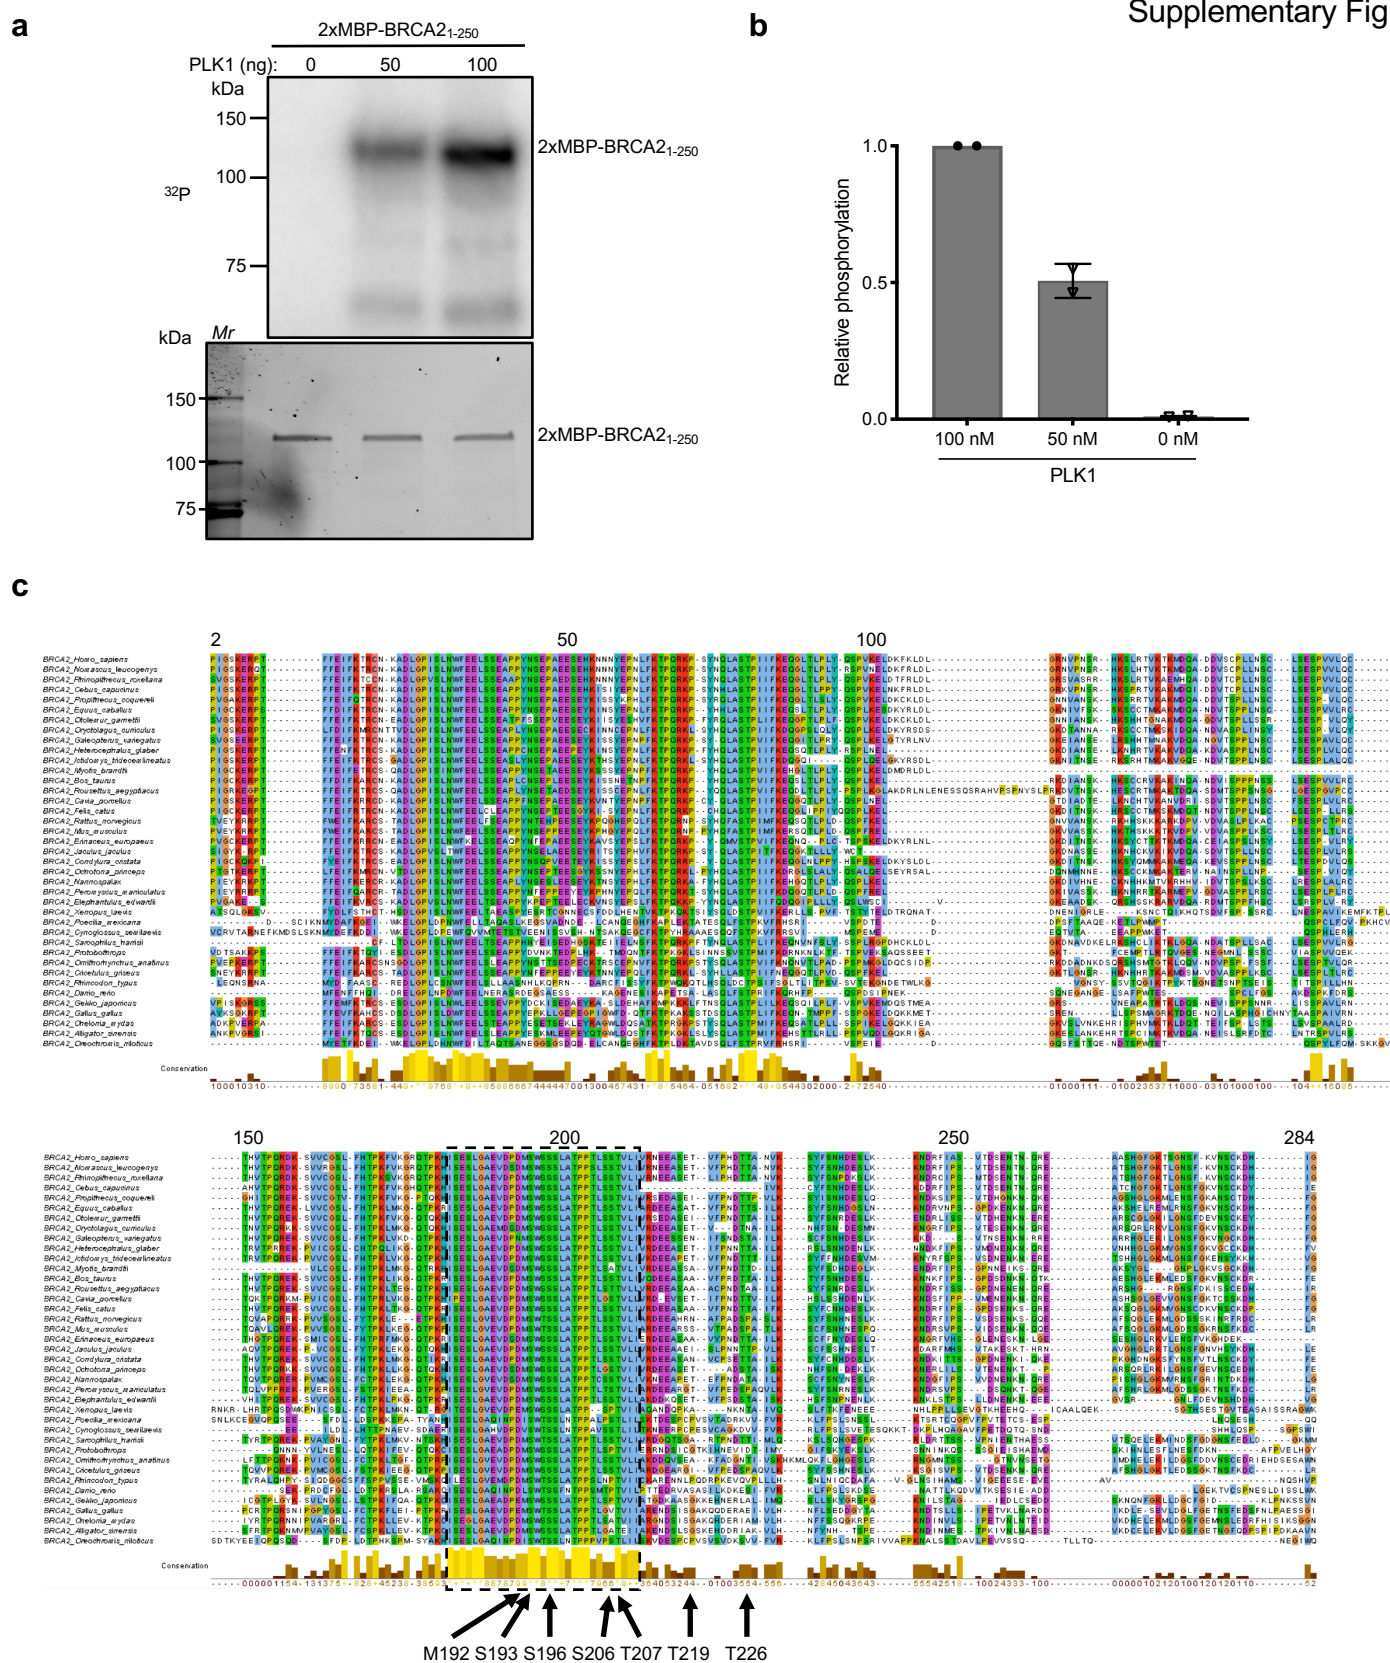

**Supplementary Figure 1. Related to Figure 1. PLK1 phosphorylation of the N-terminal region of BRCA2 and conservation of PLK1 phosphosites**

**(a)** PLK1 *in vitro* kinase assay with BRCA2<sub>1-250</sub>. Top: The polypeptide 2x-MBP-BRCA2<sub>1-250</sub> WT was incubated with increased concentrations (0, 50 and 100 ng) of recombinant PLK1 in the presence of  $\gamma^{32}\text{P}$ -ATP. The samples were resolved on 4-15% SDS-PAGE and the  $^{32}\text{P}$ -labeled products were detected by autoradiography. Bottom: 4-15% SDS-PAGE showing the input of 2xMBP-BRCA2<sub>1-250</sub> WT (0.5  $\mu\text{g}$ ) used in the reaction. **(b)** Quantification of the relative phosphorylation in (a). Data are represented as mean  $\pm$  SD from two independent experiments. **(c)** Alignment of the region 2-284 of human BRCA2 with the N-terminal regions of BRCA2 from 40 different species. Amino acids conserved in more than 30 % of the species are highlighted with coloured background. A dashed line box identifies the highly conserved cluster around S193 (amino acid 180 to amino acid 210). Arrows show the amino acids cited in this manuscript (including the PLK1 phosphosites). Source data is available as a Source Data file.

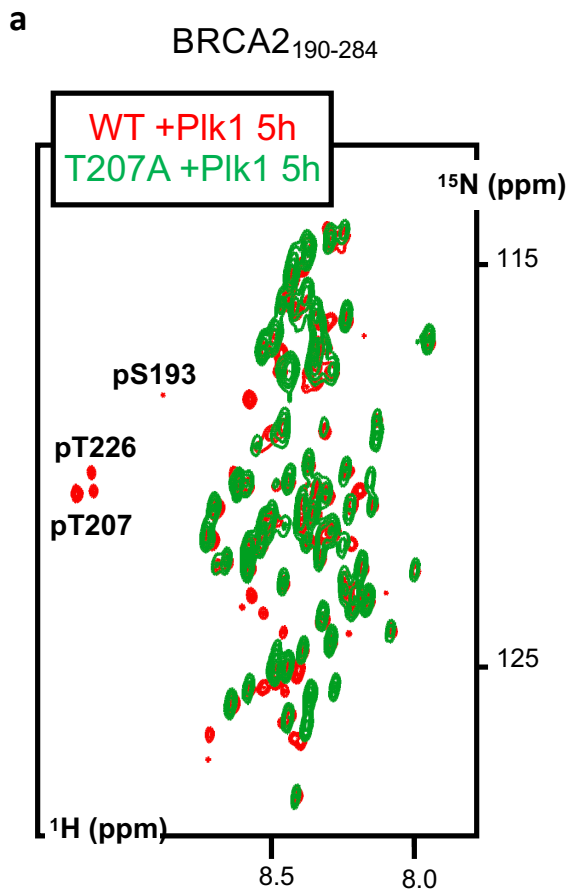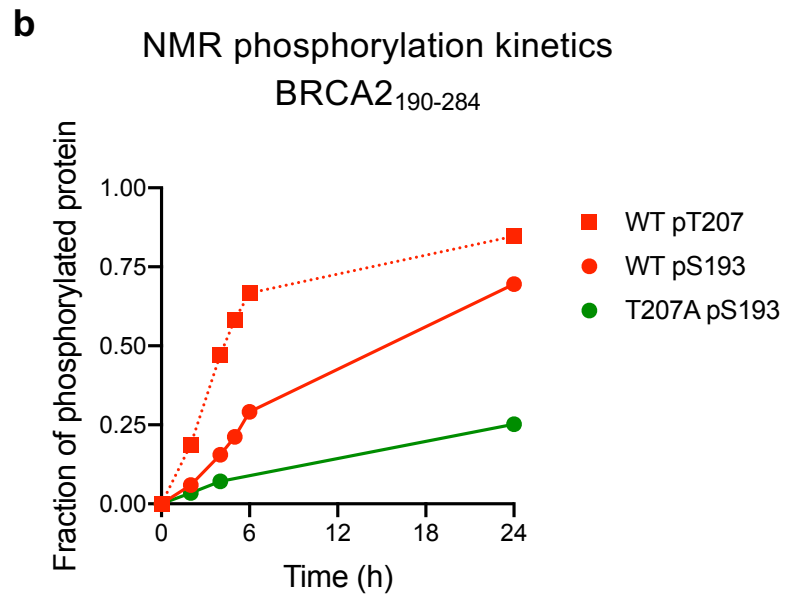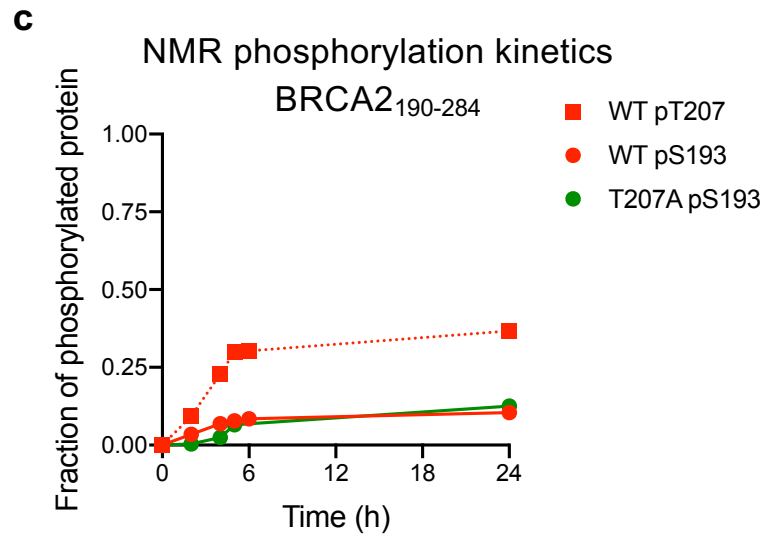

**Supplementary Figure 2. Related to Figure 2. PLK1 phosphorylation kinetics of BRCA2<sub>190-284</sub> WT vs T207A**

**(a)** Superimposition of the <sup>1</sup>H-<sup>15</sup>N HSQC spectra recorded on the <sup>15</sup>N labelled fragments BRCA2<sub>190-284</sub> WT (red) and T207A (green) after 5h of incubation with PLK1. The conditions are the same as in Figure 1. **(b,c)** Comparison of the phosphorylation kinetics of BRCA2<sub>190-284</sub> WT and T207A performed with two different PLK1 samples. The percentage of phosphorylation deduced from the intensities of the peaks corresponding to the non-phosphorylated and phosphorylated residues is plotted as a function of time. WT S193 and T207 time points are represented by red circles and squares, respectively, while T207A S193 timepoints are represented by green circles. Source data is available as a Source Data file.

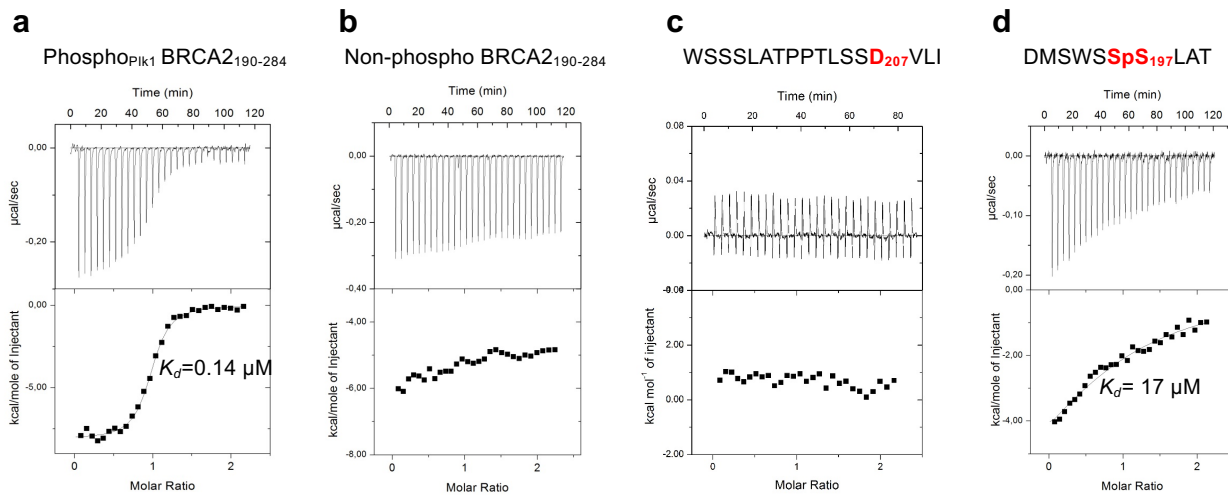

**Supplementary Figure 3. Related to Figure 3. Isothermal Titration Calorimetry (ITC) thermogram showing binding of PLK1<sub>PBD</sub> to the fragment BRCA2<sub>190-284</sub> or a 10 aa BRCA2 peptide containing pS197**

Thermogram showing the binding affinity of PLK1<sub>PBD</sub> to the **(a)** phosphorylated or **(b)** non-phosphorylated BRCA2<sub>190-284</sub> fragment, purified from bacteria as explained in the Methods section and also used in the NMR experiments. **(c)** Thermogram showing the binding affinity of PLK1<sub>PBD</sub> to a 17 aa BRCA2 synthetic peptide comprising T207D (WSSSLATPPTLSSD<sub>207</sub>VLI). **(d)** Thermogram showing the binding affinity of PLK1<sub>PBD</sub> to a 10 aa BRCA2 synthetic peptide comprising pS197. Source data is available as a Source Data file.

**a**

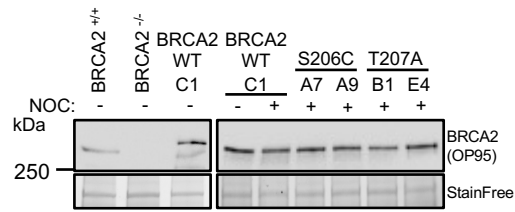

**b**

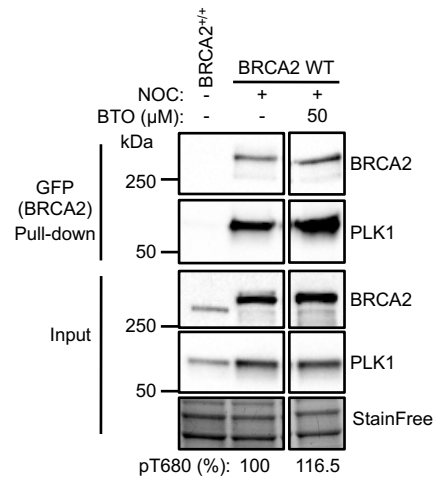

**c**

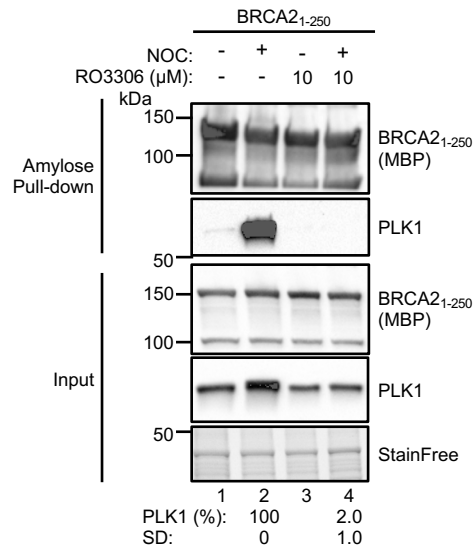



**Supplementary Figure 4. Related to Figures 3-8. BRCA2 protein levels in DLD1 BRCA2<sup>-/-</sup> stable clones bearing BRCA2 WT and variants utilized in this study and effect of PLK1 and CDK1 inhibitors on the interaction between BRCA2 and PLK1**

**(a)** BRCA2 protein levels in total cell extracts from DLD1 cells stably expressing EGFP-MBP-BRCA2 WT (BRCA2 WT C1) or the variants S206C (clones A7 and A9) and T207A (clones B1 and E4) as detected by western blot using anti-BRCA2 (OP95) antibody. **(b)** The effect of PLK1 inhibitors on the interaction between BRCA2 WT and PLK1. BRCA2 WT cells were treated with nocodazole (100 ng/ml, 14h), then treated with the PLK1 inhibitor BTO (50  $\mu$ M, 2h) before harvesting. BRCA2 was pull-down with GFP-trap beads, immunocomplexes were resolved on 4-15% SDS-PAGE followed by WB using anti-PLK1 and -MBP antibodies. Unsynchronized BRCA2<sup>+/+</sup> were used as control of pull-down and StainFree images of the gels before transfer were used as loading control (cropped image is shown). The amount of PLK1 co-IPed with BRCA2 relative to the input levels of PLK1 and the amount of pull-down BRCA2 is presented below the blot, relative to non-treated BRCA2 WT. **(c)** The effect of CDK1 inhibitors on the interaction between 2xMBP-BRCA2<sub>1-250</sub> and PLK1. U2OS cells transiently transfected with the 2xMBP-BRCA2<sub>1-250</sub> WT, were arrested in mitosis with nocodazole (300 ng/ml, 14h) and then treated with CDK1 inhibitor (Ro-3306 50nM, 2h) before amylose pull-down. Complexes were resolved on 4-15% SDS-PAGE followed by WB using anti-PLK1 and anti-MBP antibodies. The amount of PLK1 co-immunoprecipitated with 2xMBP-BRCA2<sub>1-250</sub> relative to the input levels of PLK1 and the amount of pull-down 2xMBP-BRCA2<sub>1-250</sub> is presented below the blot as mean  $\pm$  SD from three independent experiments. The data is presented relative to the non-treated BRCA2 WT. Immunoblots in (a) and (c) are representative of three independent experiments. Source data is available as a Source Data file.

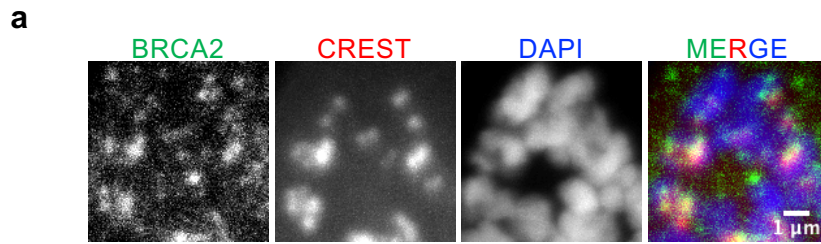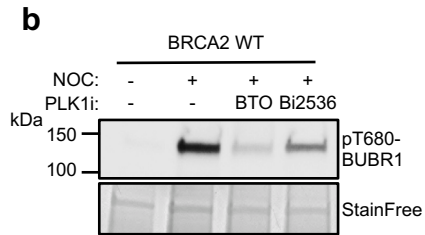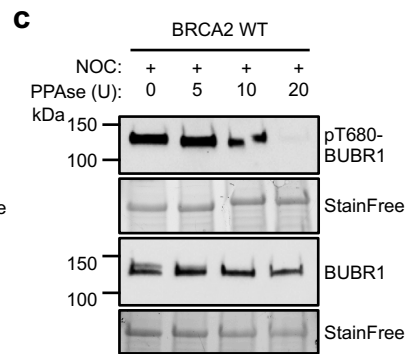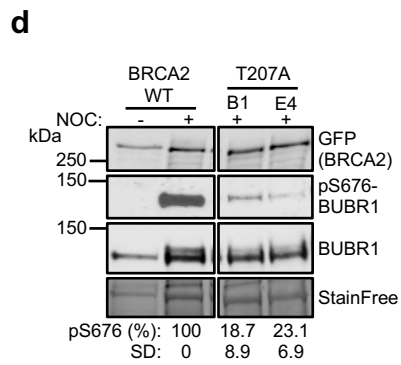

**Supplementary Figure 5. Related to Figure 5. BRCA2 at the kinetochores and effect of PLK1 inhibitors and phosphatase treatment on pT680-BUBR1.**

**(a)** Representative images of the localization of BRCA2 in nocodazole-arrested U2OS transient expressing GFP-MBP-BRCA2 WT. BRCA2 is detected by anti-BRCA2 rabbit antibody (CA1033), CREST is used as centromere marker and DNA is counterstained with DAPI. Scale bar represents 1  $\mu$ m. The figures are representative of three independent experiments. **(b)** Protein levels of pT680-BUBR1 in BRCA2 WT stable clone after treatment with PLK1 inhibitors. After 14h culture with media containing nocodazole (100 ng/ $\mu$ l), PLK1 inhibitors (Bi2536 (50 nM) or BTO (50  $\mu$ M)) were added to the media and the cells were cultured for additional 2h before harvesting. The level of pT680-BUBR1 was analyzed in the total protein extract by western blot. **(c)** Phosphatase (Fast AP) treatment of total protein lysate extracted from DLD1 BRCA2 WT cells treated with nocodazole (100 ng/ $\mu$ l) for 14h. **(d)** Western blot showing the expression levels of endogenous BUBR1 and pS676-BUBR1 in nocodazole treated stable clones of DLD1 BRCA2 deficient cells (BRCA2<sup>-/-</sup>) expressing GFPMBP-BRCA2 WT (BRCA2 WT) or T207A variant. The levels of pS676-BUBR1 was analyzed in the total protein extract by western blot. The mean pBUBR1 signal relative to the stain free signal is shown for the nocadazole treated samples below the blots. Results are presented normalized to the protein levels for BRCA2 WT. The data represents the mean  $\pm$  SD of two independent experiments. Immunoblots in (b-d) are representative of two (b, d) and three (c) independent experiments. Source data is available as a Source Data file.

**a**

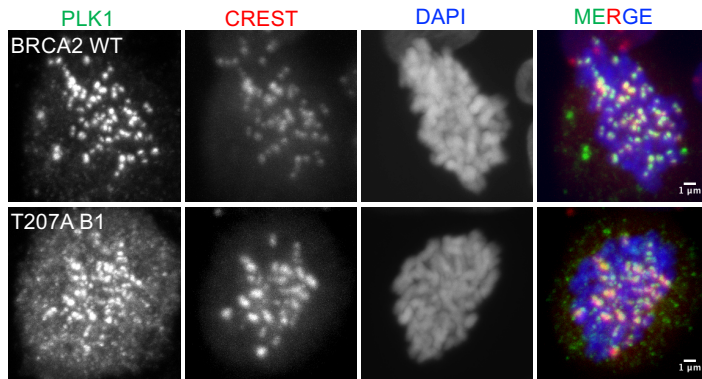

**b**

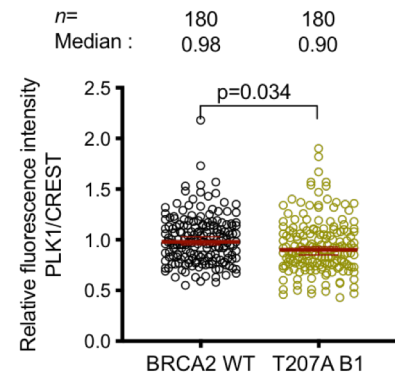

**c**

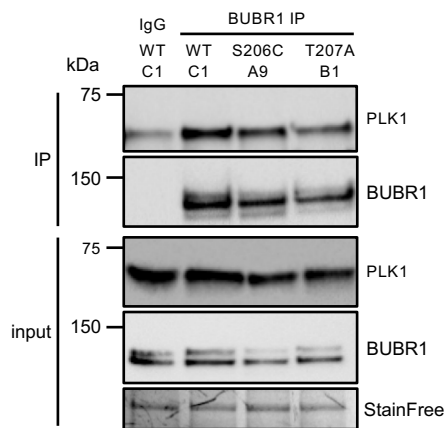

**d**

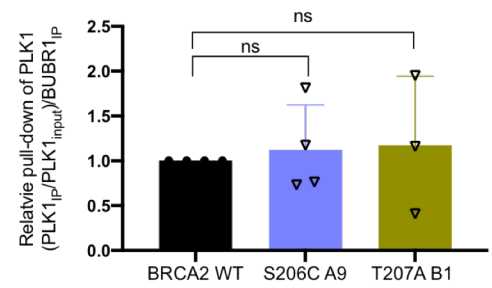

**Supplementary Figure 6. Related to Figure 5. Localization of BRCA2 and PLK1 at the kinetochores and PLK1-BUBR1 complex in cells bearing variant T207A compared to WT**

**(a)** Representative images of the localization of PLK1 in nocodazole-arrested DLD1 BRCA2<sup>-/-</sup> cells stably expressing GFP-MBP-BRCA2 WT or the variant T207A as indicated. CREST is used as centromere marker and DNA is counterstained with DAPI. Scale bar represents 1  $\mu$ m.

**(b)** Quantification of the co-localization of PLK1 and CREST in (a). The data represents the intensity ratio (PLK1:CREST) relative to the mean ratio of PLK1:CREST for the GFP-MBP-BRCA2 WT calculated from a total of 180 pairs of chromosomes analysed from two independent experiments (6 pairs of chromosomes/cell from 15 cells). The red line in the plot indicates the median (95% CI) ratio, each dot represents a pair of chromosomes. For statistical comparison of the differences between the samples we applied a Mann-Whitney two-tailed analysis, the p-values show significant difference.

**(c)** Co-immunoprecipitation of endogenous PLK1 with endogenous BUBR1 from mitotic cell extracts of BRCA2 WT cells or cells expressing the variants S206C or T207A using mouse anti-BUBR1 antibody. Mouse IgG was used as control for the BUBR1 immunoprecipitation. The immuno-complexes were resolved on 4-15% SDS-PAGE followed by western blotting, the interactions were revealed by rabbit anti-BUBR1 and mouse anti-PLK1 antibodies.

**(d)** Quantification of co-immunoprecipitated PLK1 in (c), relative to the input levels and the amount of immunoprecipitated BUBR1. Results are presented as the fold change compared to the BRCA2 WT clone. The data represents the mean  $\pm$  SD of three to four independent experiments (WT (n=4), S206C A9 (n=4) and T207A B1 (n=3)). Statistical significance of the difference was calculated with one-way ANOVA test with Dunnett's multiple comparisons test, the p-values show the significant difference, ns: non-significant. Source data is available as a Source Data file.

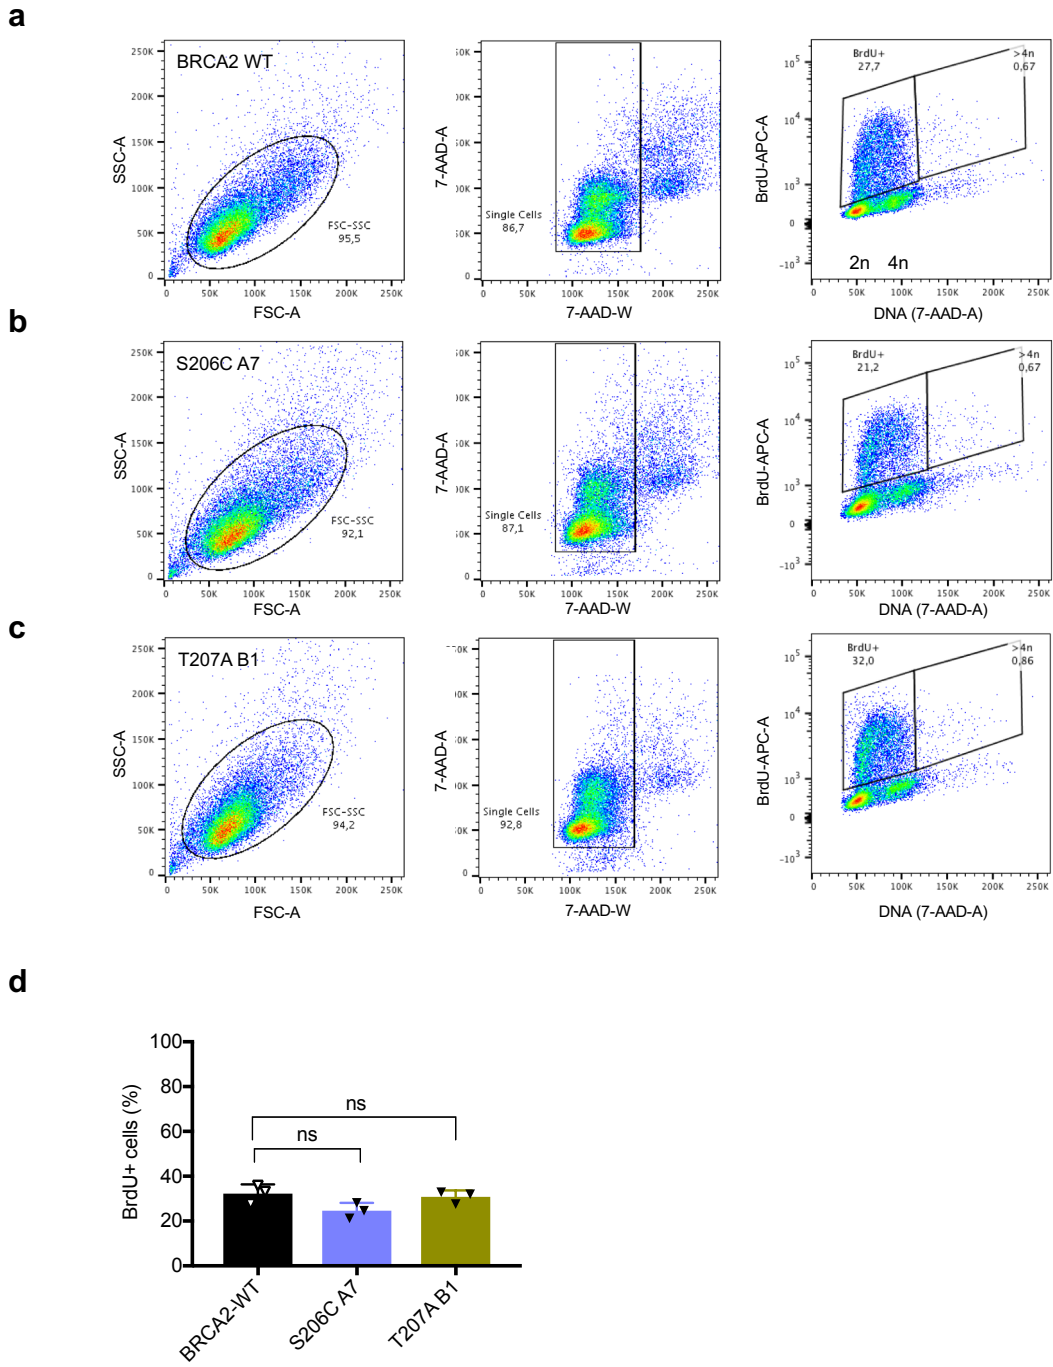

**Supplementary Figure 7. Related to Figure 7. BrdU incorporation measured by flow cytometry of DLD1 BRCA2<sup>-/-</sup> stable cell lines expressing BRCA2 WT or BRCA2 variants S206C and T207A.**

**(a-c)** Representative flow cytometry plots for the analysis of S-phase tetraploid cells (quantified in Figure 7c, d) in the stable DLD1 BRCA2 deficient cells expressing BRCA2 WT (a) or the VUS S206C (b) and T207A (c). Viable cells were gated from the Forward Scatter (FSC-A) versus Side Scatter (SSC-A) plots and displayed in a 7-AAD-W versus 7-AAD-A plot to exclude doublets. The gated singlet population was displayed in a APC-A (BrdU) versus 7-AAD-A (DNA) plot. The S-phase tetraploid population was gated as BrdU<sup>+</sup> cells with DNA content >4N. 20,000 singlet events were collected for each experiment. **(d)** Frequency of BrdU<sup>+</sup> cells in the stable clones expressing BRCA2 WT or the VUS as indicated. The data represents the mean  $\pm$  SD of three independent experiments. Statistical significance of the difference was calculated with one-way ANOVA test with Tukey's multiple comparisons test (the p value show the difference compared to WT, ns: non-significant). Source data is available as a Source Data file.

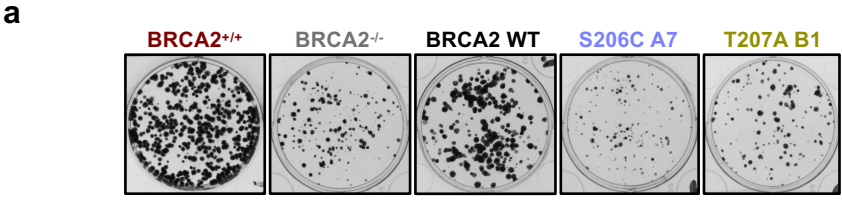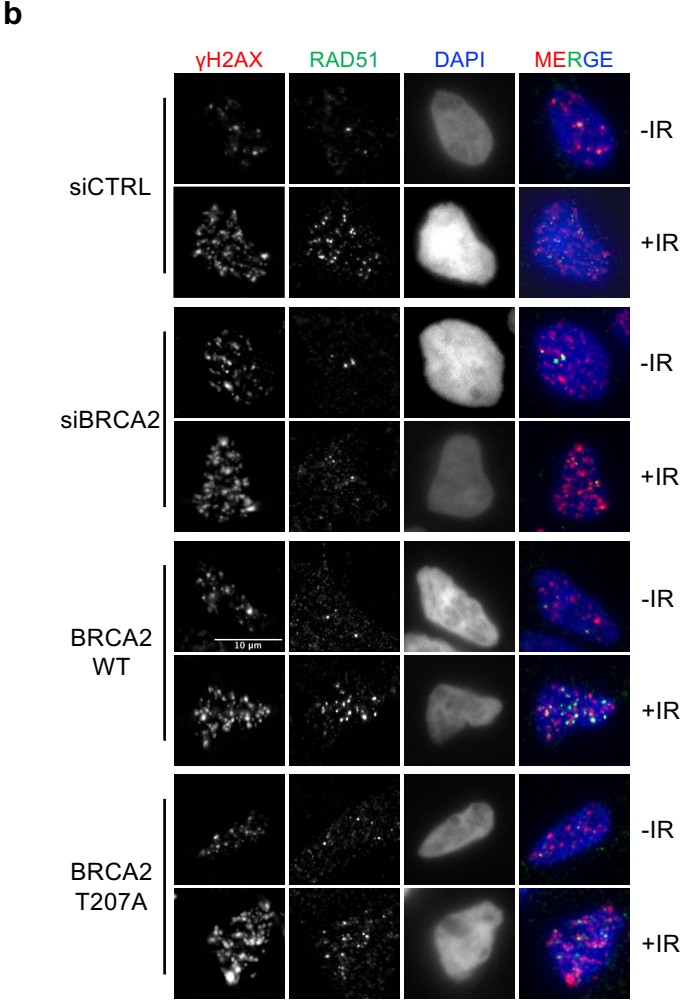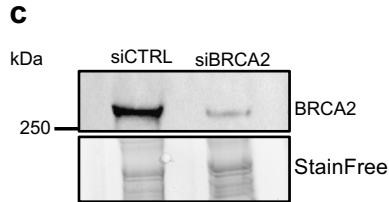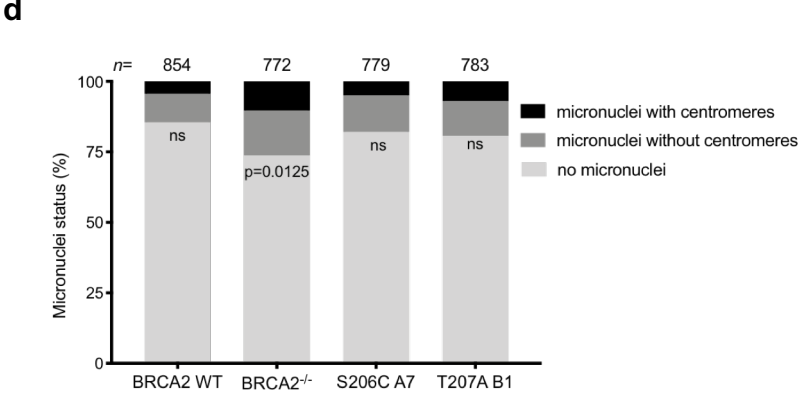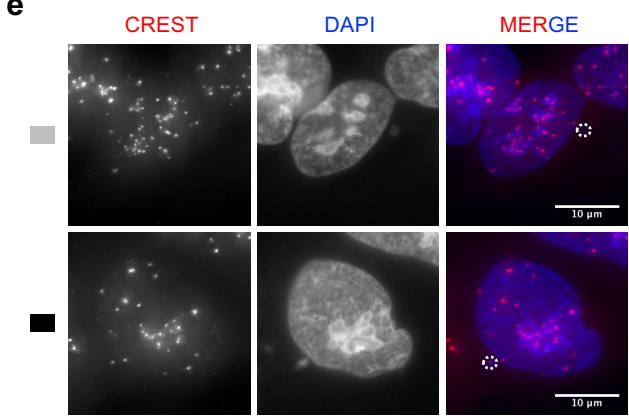



**Supplementary Figure 8.** Related to Figure 8. **Plating efficiency of unchallenged DLD1 BRCA2<sup>-/-</sup> stable clones expressing EGFP-MBP-BRCA2 WT or the variants, and representative images of DNA damage foci in these cells. Micronuclei in BRCA2<sup>-/-</sup> stable cell lines and BRCA2<sup>-/-</sup> expressing BRCA2 WT or BRCA2 variants S206C and T207A.**

**(a)** Representative plates showing the number of colonies in unchallenged conditions of the cells assessed for MMC-clonogenic survival assay quantified in Fig. 9a (500 cells seeded per 6-well plate). **(b)** Representative immunofluorescence images of two independent experiments of nuclear  $\gamma$ H2AX and RAD51 foci in DLD1 BRCA2<sup>+/+</sup> cells depleted of BRCA2 (siBRCA2), BRCA2<sup>+/+</sup> control cells (siCTRL), DLD1 BRCA2 deficient cells (BRCA2<sup>-/-</sup>) stably expressing BRCA2 WT or the variant T207A, in non-treated (-IR) or two hours after exposure to 6 Gy of  $\gamma$ -irradiation (+IR), as indicated in the images and as quantified in Fig. 9d, 9e. Scale bar represents 10  $\mu$ m. **(c)** Representative Western blot of two independent experiments showing the levels of endogenous BRCA2 in the siRNA transfected cells imaged in (b) and analysed in Fig. 9d, 9e, at the time for radiation. **(d)** Frequency of micronuclei with and without centromeres in DLD1 BRCA2 deficient cells (BRCA2<sup>-/-</sup>) and BRCA2<sup>-/-</sup> clones stably expressing BRCA2 WT or the variants S206C and T207A. *n* indicates the total number of cells counted for each clone from two independent experiments. Statistical significance of the difference was calculated with two-way ANOVA test with Tukey's multiple comparisons test, the p-values show the significant difference, ns: non-significant. **(e)** Representative images of micronuclei with and without centromeres observed in cells quantified in (d), scale bar represents 10  $\mu$ m. Source data is available as a Source Data file.

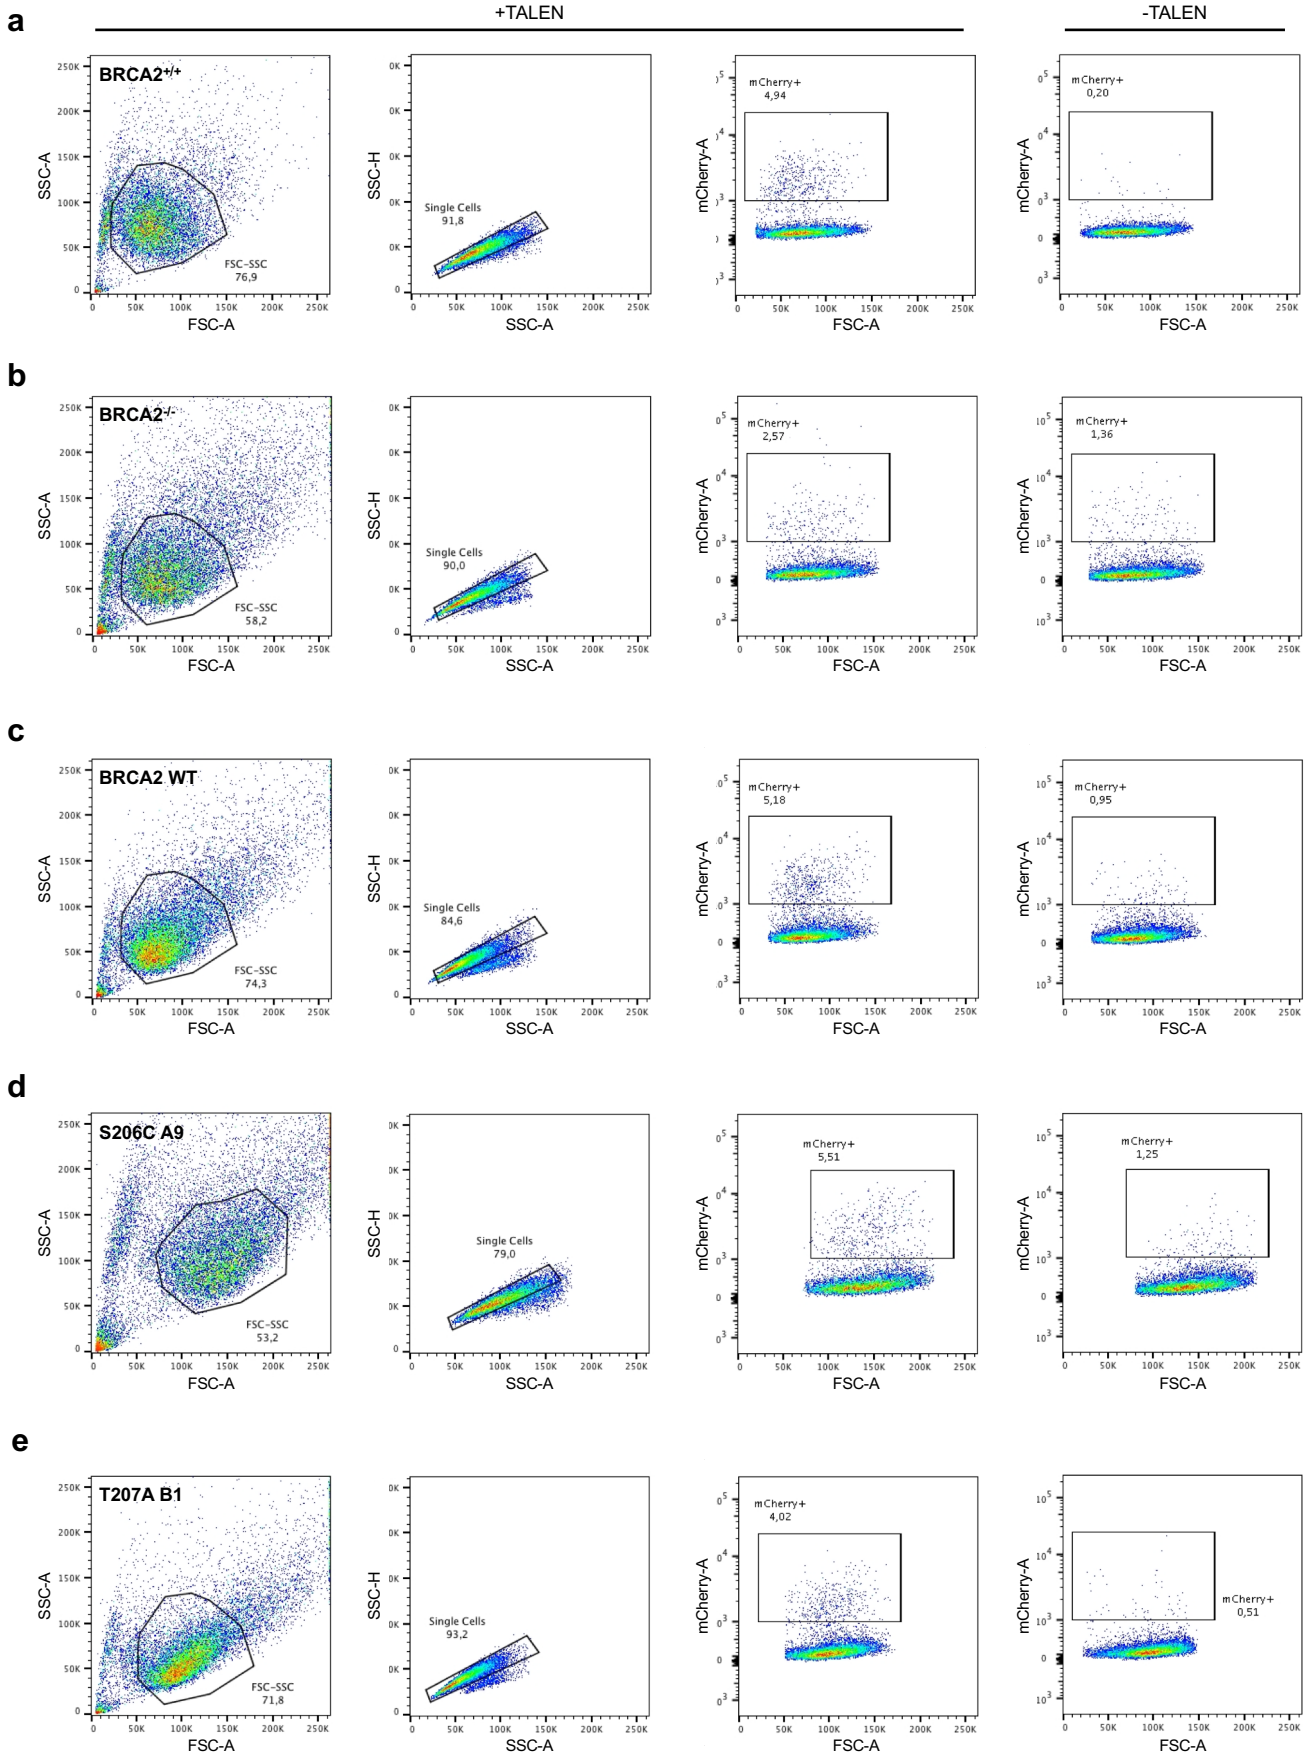

**Supplementary Figure 9. Related to Figure 8f. Frequency of mCherry positive cells measured by flow cytometry of DLD1 BRCA2<sup>-/-</sup> stable cell lines expressing BRCA2 WT or BRCA2 variants S206C and T207A.**

**(a-e)** Representative flow cytometry plots for the analysis of mCherry positive cells in the HR assay (quantified in Fig. 9f) in DLD1 cells with endogenous BRCA2 (BRCA2<sup>+/+</sup>) (a), DLD1 BRCA2 deficient cells (BRCA2<sup>-/-</sup>) (b), BRCA2 deficient cells expressing BRCA2 WT (c) or the VUS S206C (d) and T207A (e). Viable cells were gated from the Forward Scatter (FSC-A) versus Side Scatter (SSC-A) plots and displayed in a SSC-H versus SSC-A plot to exclude doublets. The gated singlet population was displayed in a mCherry-A versus FSC-A plot. The mCherry positive population was gated from non-transfected cells. 10 000 singlet events were collected for each experiment. Source data is available as a Source Data file.

**a**

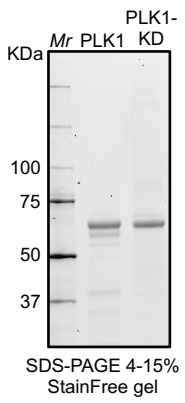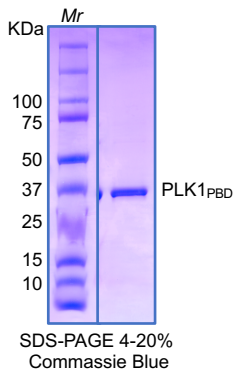

**b**

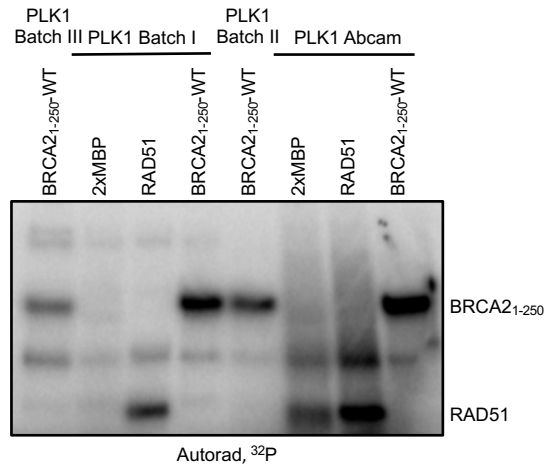

**Supplementary Figure 10. SDS-PAGE of the PLK1, PLK1-KD and PLK1-PBD recombinant proteins utilized in this study and comparison of the kinase activity of each batch of PLK1**

**(a)** SDS-PAGE showing purified PLK1, PLK1-K82R mutant (PLK1-KD) and PLK1<sub>PBD</sub>.

Human PLK1 was expressed and purified from sf9 insect cells using Ni-NTA column followed by a second purification step with a cationic exchange Capto S column. Purified PLK1 and PLK1-K82R protein (3 µg) were loaded on a 4-15% SDS-PAGE Stain-Free gel. For purification of PLK1<sub>PBD</sub>, 6His-Sumo-PLK1<sub>PBD</sub> was expressed and purified from bacteria using a His-TRAP column, the His-tag was cleaved with 6xHis-SUMO Protease and the cleaved PLK1<sub>PBD</sub> was further purified using Ni-NTA agarose resin. The purified protein was loaded on a 4-20% SDS-PAGE (1.4 µg) and detected by Coomassie staining. *Mr*; molecular weight markers. **(b)** *In vitro* kinase assay with the purified PLK1 (0.1 µg) from (a) or PLK1 purchased from Abcam, 0.1 µg PLK1 was used in the kinase reaction with either RAD51 (25 ng) or purified 2xMBP-BRCA2<sub>1-250</sub> WT (0.5 µg) as substrate in the presence of [ $\gamma$ <sup>32</sup>P]-ATP. The samples were resolved by 7.5 % SDS-PAGE and <sup>32</sup>P-labeled products were detected by autoradiography. Source data is available as a Source Data file.

**Supplementary Table 1:** Number of records in ClinVar and BRCAShare data bases of the variants identified in breast cancer patients altering the amino acids investigated in this work.

The specific VUS utilized in this study are highlighted in bold.

| VUS          | ClinVar | BRCAShare |
|--------------|---------|-----------|
| <b>M192T</b> | 2       | 0         |
| S196I        | 4       | 0         |
| <b>S196N</b> | 4       | 3         |
| S196T        | 1       | 0         |
| <b>S206C</b> | 1       | 1         |
| S206Y        | 1       | 0         |
| <b>T207A</b> | 3       | 0         |
| T207I        | 4       | 0         |

**Supplementary Table 2:** Statistics table for the crystal structure of PBD\_pT207, a complex between the Polo-Box Domain of human PLK1 (aa 365 to aa 603) and the 17aa peptide pT207 of BRCA2 (aa 194 to aa 210, threonine 207 being phosphorylated).

|                                    | PBD_T207 phosphorylated<br>(PDB 6GY2) |
|------------------------------------|---------------------------------------|
| <b>Data collection</b>             |                                       |
| Space group                        | P <sub>1</sub>                        |
| Cell dimensions :                  |                                       |
| <i>a</i> , <i>b</i> , <i>c</i> (Å) | 50.000 56.040 61.030                  |
| $\alpha$ , $\beta$ , $\gamma$ (°)  | 80.79 79.23 65.05                     |
| Molecules per a.u                  | 2                                     |
| Resolution (Å)                     | 59.70 – 3.106 (3.106 – 3.16)          |
| <i>R</i> <sub>merge</sub>          | 0.056 (0.346)                         |
| <i>R</i> <sub>meas</sub>           | 0.076 (0.466)                         |
| <i>R</i> <sub>pim</sub>            | 0.051 (0.31)                          |
| <i>I</i> / $\sigma$ ( <i>I</i> )   | 10.1 (2.3)                            |
| <i>CC</i> <sub>1/2</sub>           | 0.997 (0.821)                         |
| Completeness (spherical, %)        | 93.7 (96.9)                           |
| Redundancy                         | 1.94 (1.977)                          |
| B Wilson (Å <sup>2</sup> )         | 76.9 (78.86)                          |
| Multiplicity                       | 1.9 (2.0)                             |

---

**Refinement**

|                                     |                            |
|-------------------------------------|----------------------------|
| Resolution (Å)                      | 22.57 - 3.11 (3.11 – 3.15) |
| No. reflections                     | 9911                       |
| $R_{\text{work}} / R_{\text{free}}$ | 0.189/0.215                |
| No. Atoms                           |                            |
| Protein                             | 3788                       |
| Heterogen atoms                     | 28                         |
| Water                               | 22                         |
| R.m.s. deviations                   |                            |
| Bond lengths (Å)                    | 0.007                      |
| Bond angles (°)                     | 0.97                       |

---

\*Values in parentheses are for highest-resolution shell.

**Supplementary Table 3:** Primers used to introduce point mutations in EGFMBP-BRCA2, 2xMBP-BRCA2<sub>1-250</sub>, GST-BRCA2<sub>190-284</sub> constructs

| Mutation | Oligo name  | Sequence (5'-3')                               |
|----------|-------------|------------------------------------------------|
| S193A    | Fw : oAC543 | CCC ACC CTT AGT TCT GCT GTG CTC ATA GTC        |
|          | Rv : oAC544 | GAC TAT GAG CAC AGC AGA ACT AAG GGT<br>GGG     |
| M192T    | Fw : oAC283 | GTGGATCCTGATACGTCTTGGTCAAGTTC                  |
|          | Rv : oAC284 | GA ACT TGA CCA AGA CGT ATC AGG ATC CAC         |
| S196N    | Fw : oAC026 | CCTGATATGTCTTGGTCAAATTCTTTAGCTACA<br>CCACC     |
|          | Rv : oAC027 | GGTGGTGTAGCTAAAGAATTTGACCAAGACAT<br>ATCAGG     |
| S206C    | Fw : oAC028 | CCACCCACCCTTAGTTGTACTGTGCTCATAGTC<br>AG        |
|          | Rv : oAC029 | CTGACTATGAGCACAGTACAATAAGGGTGGG<br>TGG         |
| T207A    | Fw : oAC545 | GGA TCC TGA TAT GGC TTG GTC AAG TTC TTT<br>AGC |

|  |             |                                                |
|--|-------------|------------------------------------------------|
|  | Rv : oAC546 | GCT AAA GAA CTT GAC CAA GCC ATA TCA<br>GGA TCC |
|--|-------------|------------------------------------------------|

**Supplementary Table 4:** Sequencing primers

| <b>Construct</b>                                      | <b>Oligo name</b> | <b>Binding site</b> | <b>Sequence (5'-3')</b>        |
|-------------------------------------------------------|-------------------|---------------------|--------------------------------|
| GFPMBP-<br>BRCA2,<br>GST-<br>BRCA2 <sub>190-284</sub> | Rv :<br>oAC131    | aa 273<br>BRCA2     | TTAGTTCGACTTATCCAATGTGGTCTTT   |
| 2xMBP-<br>BRCA2 <sub>1-250</sub>                      | Fw :<br>oAC149    | aa 1-6<br>BRCA2     | TTATTTGCTAGCCCTATTGGATCCAAAGAG |
| PLK1                                                  | Fw :<br>oAC907    | aa 38<br>PLK1       | AAAGAGATCCCGGAGGTCCTAGTG       |

**Supplementary Table 5:** Primers used to subclone BRCA2<sub>190-284</sub> into the pGEX-6P-1 vector

| <b>Construct</b>         | <b>Oligo name</b> | <b>Sequence (5'-3')</b>      |
|--------------------------|-------------------|------------------------------|
| BRCA2 <sub>190-284</sub> | Fw: oAC130        | TTAGGATCCATGTCTTGGTCAAGTTCT  |
|                          | Rv: oAC131        | TTAGTTCGACTTATCCAATGTGGTCTTT |

**Supplementary Table 6:** Primers used to subclone *PLK1* cDNA into pFastBac HT

| <b>Primer name</b> | <b>Sequence (5'-3')</b>            |
|--------------------|------------------------------------|
| GA_pFBtev_R        | GCCCTGAAAATACAGGTTTTTCGGTCGTTGGGAT |



|                  |                                                            |
|------------------|------------------------------------------------------------|
| GA_pFB_UTR<br>_F | TTGTCGAGAAGTACTAGAGGATCATAATCA                             |
| GA_hPLK_F        | ATCCCAACGACCGAAAACCTGTATTTTCAGGGCATGAGT<br>GCTGCAGTGACTGCA |
| GA_hPLK_R        | TGATTATGATCCTCTAGTACTTCTCGACAATTAGGAGGC<br>CTTGAGACGGTT    |

**Supplementary Table 7:** Primers used to introduce K82R point mutation in pFastBAC-PLK1 vector to produce PLK1-KD and to subclone PLK1<sub>PBD</sub> (aa 326-603) into pT7-His6-SUMO

| Product             | Oligo name        | Sequence (5'-3')                                       |
|---------------------|-------------------|--------------------------------------------------------|
| K82R-PLK1           | Fw :<br>oAC905    | GCG GGCAGGATTGTGCCTAAG                                 |
|                     | Rv :<br>oAC906    | CTTAGGCACAATCCTGCCCCGC                                 |
| PLK1 <sub>PBD</sub> | GA_PLKP<br>DBwt_F | ATTGAGGCTCACCGCGAACAGATTGGTGGCTC<br>GATTGCTCCCAGCAGCCT |
|                     | GA_PLKPDB<br>wt_R | TTCCTTTCGGGCTTTGTTAGCAGCCGGTCATTA<br>GGAGGCCTTGAGACGGT |

**Supplementary Table 8:** Primers used to introduce S670D, S676D and T680D point mutations in pcDNA3-3xFlagBUBR1-RFP construct

| Name   | Sequence (5'-3')                                                       |
|--------|------------------------------------------------------------------------|
| oAC884 | CAA GAA GCT GGA CCC AAT TAT TGA AGA CGA TCG<br>TGA AGC CGA CCA CTC CTC |
| oAC885 | GAG GAG TGG TCG GCT TCA CGA TCG TCT TCA ATA<br>ATT GGG TCC AGC TTC TTG |

**Supplementary Table 9:** Synthetic peptide sequences for Isothermal Titration Calorimetry (ITC) and X-ray crystallography

| Peptide | Sequence             |
|---------|----------------------|
| pS197   | DMSWSS{pS}LAT        |
| T207    | WSSSLATPPTLSSTVLI    |
| pT207   | WSSSLATPPTLSS{pT}VLI |
| T207A   | WSSSLATPPTLSSAVLI    |
| T207D   | WSSSLATPPTLSSDVLI    |
| CpT207  | WSSSLATPPTLSC{pT}VLI |

**Supplementary Table 10:** Primers for amplifying BRCA2 (aa 1-267) from genomic DNA

| Primer name | Sequence (5'-3')                              |
|-------------|-----------------------------------------------|
| Fw : oAC035 | GGTCGTCAGACTGTCGATGAAGCC                      |
| Rv : oAC056 | CAAAGAGAAGCTGCAAGTCATGGATTTGAAAAACATC<br>AGGG |

**Supplementary Table 11:** Oligos used for replacing GFP in AAVS1-2A-GFP to mCherry using Gibson Assembly strategy

| Construct        | Oligo name | Sequence (5'-3')                                 |
|------------------|------------|--------------------------------------------------|
| AAVS1-2A         | Fw: oAC537 | TAAAGCGGCCGCGTCGAGTCTAGAGGG                      |
|                  | Rv: oAC538 | CATCTCGAGCCTAGGGCCGGG                            |
| AAVS1-2A-mCherry | Fw: oAC539 | cccggcctaggctcgagatgGTGAGCAAGGGCGA<br>GGAGGATAAC |

|  |            |                                                     |
|--|------------|-----------------------------------------------------|
|  | Rv: oAC540 | ctctagactegacgcgccgctttaCTTGTACAGCTCGT<br>CCATGCCGC |
|--|------------|-----------------------------------------------------|

**Supplementary Table 12:** TALEN sequences used in DSB-mediated gene targeting assay

| <b>Name</b>      | <b>Sequence (5'-3')</b> |
|------------------|-------------------------|
| TALEN AAVS<br>5' | TCCCCTCCACCCCACAGT      |
| TALEN AAVS<br>3' | AGGATTGGTGACAGAAAA      |
